# Supplementary material
Source: Springer Nature journal article supplement (https://www.springermedizin.de/resource/supplementary/12888_2014_1654_MOESM4_ESM.pdf/9481114)

# Resting state networks

Medial Visual Cortex

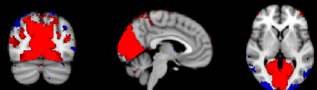

Lateral Visual Cortex

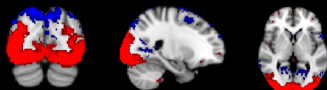

R

Auditory system

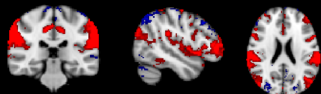

Sensory-motor system

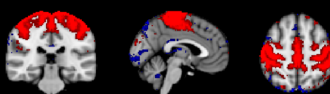

L

Anterior Default Mode Network

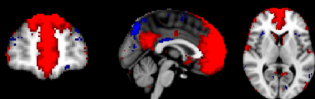

Posterior Default Mode Network

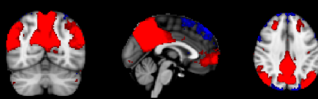

R

Left fronto-parietal network

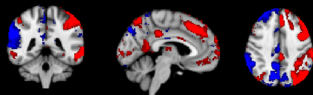

Right fronto-parietal network

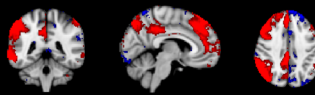

L

Executive control

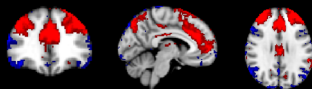

Supplement: MOESM4 [file 9481114]
